# Supplementary material
Source: publisher site journal article supplement (https://www.dovepress.com/article/219696)
Supplement: Supplementary file 1 [file get_supplementary_file.php]

Supplementary table 1. The detailed characteristics of studied patients with urinary tract infection

| No. | Age | Gender | Hospital    | Multi-drug resistance | ESBLs    | Antibiotic resistance pattern                           | Gene pattern                                                                 |
|-----|-----|--------|-------------|-----------------------|----------|---------------------------------------------------------|------------------------------------------------------------------------------|
| 1   | 24  | Female | Al-Zahra    | MDR                   | Negative | SXT-TET-CIP-NAL-CEP-AUG-AMP                             | fyuA-bmaE-sfa/focDE-papAH-papEF-kpsMT II-papC-papG II-traT-usp-afa/draBC     |
| 2   | 6   | Female | Al-Zahra    | MDR                   | Negative | SXT-TET-NAL-CEP-AMP                                     | fyuA-bmaE-papAH-papEF-kpsMT II-papC-papG II-traT-iron-usp                    |
| 3   | 72  | Male   | Razi        | MDR                   | Positive | AZT-SXT-TET-CIP-OFX-NAL-CAZ-CRO-FEP-CFM-CTX-CEP-AUG-AMP | fyuA-bmaE-sfa/focDE-ibeA-kpsMT II-papC-papG II-traT-focG-usp                 |
| 4   | 5   | Female | Al-Zahra    | Non-MDR               | Negative | AMP                                                     | fyuA-sfa/focDE-ibeA-fimH-kpsMT II-papC-papG II-traT-focG-usp-afa/draBC       |
| 5   | ≤1  | Female | Al-Zahra    | MDR                   | Positive | AZT-SXT-NAL-CAZ-CRO-FEP-CFM-CTX-CEP-AMP                 | fyuA-bmaE-ibeA-kpsMT II-papC-papG II-traT-focG-usp-afa/draBC                 |
| 6   | 71  | Male   | Razi        | MDR                   | Positive | AZT-GEN-CIP-OFX-NAL-CAZ-CRO-FEP-CFM-CTX-CEP-AMP         | fyuA-bmaE-sfa/focDE-kpsMT II-papC-papG II-traT-usp                           |
| 7   | 15  | Female | Razi        | MDR                   | Negative | SXT-TET-CIP-AMP                                         | fyuA-bmaE-sfa/focDE-kpsMT II-papC-papG II-traT-usp                           |
| 8   | 73  | Male   | Razi        | Non-MDR               | Negative | None                                                    | fyuA-bmaE-papAH-papEF-kpsMT II-papC-papG II-traT-usp                         |
| 9   | ≤1  | Female | Rasol Akram | Non-MDR               | Negative | NAL                                                     | fyuA-ibeA-kpsMT II-traT-usp-afa/draBC                                        |
| 10  | ≤1  | Female | Al-Zahra    | MDR                   | Negative | TET-NAL-FEP-CEP-AUG-AMP                                 | fyuA-bmaE-papEF-kpsMT II-papC-traT-usp-afa/draBC                             |
| 11  | ≤1  | Female | Rasol Akram | Non-MDR               | Negative | NAL-AMP                                                 | fyuA-bmaE-sfa/focDE-ibeA-kpsMT II-papC-papG II-traT-usp                      |
| 12  | 83  | Female | Golsar      | MDR                   | Negative | SXT-NAL-CFM-CTX-CEP-NIT-AUG-AMP                         | fyuA-bmaE-ibeA-kpsMT II-traT-usp                                             |
| 13  | 86  | Female | Golsar      | Non-MDR               | Negative | GEN-NAL                                                 | fyuA-sfa/focDE-papG III-papAH-papEF-kpsMT II-papC-papG II-traT-usp-sfaS-cnfl |
| 14  | 80  | Female | Golsar      | MDR                   | Negative | GEN-SXT-TET-CIP-NAL-AUG-AMP                             | fyuA-papAH-kpsMT II-papC-papG II-traT-focG-usp                               |

|    |    |        |          |         |          |                                                                 |                                                                                           |
|----|----|--------|----------|---------|----------|-----------------------------------------------------------------|-------------------------------------------------------------------------------------------|
| 15 | 82 | Female | Golsar   | MDR     | Negative | GEN-SXT-CIP-OFX-NAL- CEP-AUG-AMP                                | fyuA-ibeA-kpsMT II-usp-afa/draBC-cnfl                                                     |
| 16 | 68 | Female | Razi     | MDR     | Negative | GEN-SXT-TET-CEP-AMP                                             | fyuA-ibeA-kpsMT II-papC-papG II-traT                                                      |
| 17 | 84 | Female | Razi     | MDR     | Positive | AZT-GEN-TET-CIP-OFX-NAL-CAZ-CRO-FEP-CFM-CTX-CEP-AUG-AMP         | fyuA-bmaE-papAH-papEF-kpsMT II-papC-papG II-traT-usp                                      |
| 18 | 28 | Female | Al-Zahra | Non-MDR | Negative | None                                                            | fyuA-bmaE-sfa/focDE-ibeA-papG II-traT-focG-usp                                            |
| 19 | 77 | Female | Golsar   | MDR     | Negative | SXT-TET-IMI-NAL-CFM-CTX-FOX-CEP-AUG-AMP                         | fyuA-ibeA-traT-usp                                                                        |
| 20 | 82 | Female | Golsar   | MDR     | Negative | SXT-TET-NAL-CAZ-CTX-NIT-AUG-AMP                                 | fyuA-bmaE-sfa/focDE-ibeA-papG II-traT-focG-usp-afa/draBC                                  |
| 21 | 37 | Female | Al-Zahra | MDR     | Positive | AZT-SXT-TET-CAZ-CRO-FEP-CFM-CTX-CEP-AUG-AMP                     | fyuA-sfa/focDE-ibeA-papEF-kpsMT II-papC-papG II-traT-focG-usp                             |
| 22 | 77 | Male   | Golsar   | MDR     | Negative | SXT-CIP-OFX-NAL-FOX-CEP-AUG-AMP                                 | fyuA-ibeA-papEF-kpsMT II-papC-papG II-traT-focG-usp-afa/draBC                             |
| 23 | 68 | Female | Golsar   | MDR     | Positive | AZT-SXT-TET-CIP-OFX-NAL-CRO-FEP-CFM-CTX-CEP-AUG-AMP             | fyuA-bmaE-ibeA-fimH-kpsMT II-papC-papG II-traT-usp                                        |
| 24 | ≤1 | Female | Al-Zahra | MDR     | Positive | AZT-SXT-TET-CIP-OFX-NAL-CAZ-CRO-FEP-CFM-CTX-CEP-AMP             | fyuA-bmaE-kpsMT II-papC-papG II-traT-focG-usp                                             |
| 25 | 66 | Female | Golsar   | MDR     | Positive | AZT-GEN-SXT-TET-CIP-OFX-NAL-CAZ-CRO-FEP-CFM-CTX-FOX-CEP-AUG-AMP | fyuA-sfa/focDE-iutA-papG III-ibeA-kpsMT II-papC-papG II-traT-focG-usp-afa/draBC-sfaS-cnfl |
| 26 | 55 | Female | Razi     | MDR     | Positive | AZT-GEN-SXT-TET-CIP-OFX-NAL-CAZ-CRO-FEP-CFM-CTX-FOX-CEP-AUG-AMP | fyuA-bmaE-ibeA-kpsMT II-traT-usp                                                          |
| 27 | 72 | Male   | Poursina | MDR     | Positive | AZT-GEN-SXT-TET-CIP-OFX-NAL-CAZ-CRO-FEP-CFM-CTX-FOX-CEP-AUG-AMP | fyuA-sfa/focDE-ibeA-fimH-kpsMT II-traT-usp                                                |
| 28 | 53 | Female | Razi     | MDR     | Positive | AZT-SXT-CIP-OFX-NAL-CAZ-CRO-FEP-CFM-CTX-CEP-AUG-AMP             | fyuA-sfa/focDE-ibeA-fimH-papEF-kpsMT II-traT-iroN-usp                                     |
| 29 | 61 | Female | Golsar   | MDR     | Negative | SXT-TET-CIP-OFX-NAL-CEP-AMP                                     | fyuA-sfa/focDE-kpsMT II-iroN-usp                                                          |

|    |    |        |          |     |          |                                                                 |                                                                      |
|----|----|--------|----------|-----|----------|-----------------------------------------------------------------|----------------------------------------------------------------------|
| 30 | 71 | Female | Razi     | MDR | Positive | AZT-SXT-CIP-OFX-NAL-CAZ-CRO-FEP-CFM-CTX-FOX-CEP-AUG-AMP         | fyuA-sfa/focDE-ibeA-fimH-kpsMT II-traT-iroN-usp-afa/draBC            |
| 31 | 61 | Female | Razi     | MDR | Positive | AZT-GEN-SXT-TET-CIP-OFX-NAL-CAZ-CRO-FEP-CFM-CTX-FOX-CEP-AUG-AMP | fyuA-sfa/focDE-papAH-papEF-kpsMT II-traT-usp-afa/draBC               |
| 32 | 52 | Female | Razi     | MDR | Negative | GEN-SXT-TET-NAL-AMP                                             | fyuA-sfa/focDE-kpsMT II-traT-iroN-usp-afa/draBC                      |
| 33 | 77 | Male   | Razi     | MDR | Negative | SXT-TET-CIP-OFX-NAL-CAZ-CRO-CFM-CTX-CEP-AMP                     | fyuA-fimH-traT-iroN-usp                                              |
| 34 | 90 | Male   | Golsar   | MDR | Positive | AZT-IMI-CIP-OFX-NAL-CAZ-CRO-FEP-CFM-CTX-FOX-CEP-AUG-AMP         | sfa/focDE-fimH-kpsMT II-traT-usp                                     |
| 35 | 75 | Male   | Golsar   | MDR | Negative | SXT-TET-CIP-OFX-NAL-AMP                                         | fyuA-papAH-fimH-traT-iroN-usp-cnf1                                   |
| 36 | 56 | Male   | Razi     | MDR | Positive | AZT-GEN-SXT-CIP-OFX-NAL-CAZ-CRO-CFM-CTX-CEP-AMP                 | fyuA-bmaE-sfa/focDE-papG III-papAH-fimH-hlyA-papC-traT-focG-usp-cnf1 |
| 37 | 35 | Female | Golsar   | MDR | Positive | AZT-SXT-TET-CIP-OFX-NAL-CAZ-CRO-FEP-CFM-CTX-FOX-CEP-AUG-AMP     | fyuA-bmaE-papG III-fimH-hlyA-papC-traT-focG-usp-afa/draBC-cnf1       |
| 38 | 50 | Male   | Razi     | MDR | Positive | AZT-GEN-SXT-TET-CIP-OFX-NAL-CAZ-CRO-FEP-CFM-CTX-FOX-CEP-AUG-AMP | fyuA-bmaE-papG III-papAH-fimH-kpsMT II-traT-usp                      |
| 39 | 67 | Male   | Golsar   | MDR | Positive | AZT-SXT-TET-CIP-OFX-NAL-CAZ-CRO-FEP-CFM-CTX-CEP-AUG-AMP         | fyuA-bmaE-iutA-papG III-fimH-hlyA-papC-traT-afa/draBC-cnf1           |
| 40 | 52 | Male   | Poursina | MDR | Positive | AZT-SXT-TET-CIP-OFX-NAL-CAZ-CRO-CFM-CTX-CEP-AUG-AMP             | fyuA-bmaE-papG III-fimH-papG II-traT-iroN                            |
| 41 | 48 | Female | Golsar   | MDR | Positive | SXT-TET-CIP-OFX-NAL-CAZ-CRO-CFM-CTX-CEP-AUG-AMP                 | fyuA-bmaE-papG III-papAH-fimH-kpsMT II-papG II-traT-iroN-usp         |
| 42 | 65 | Male   | Razi     | MDR | Positive | AZT-GEN-SXT-TET-CIP-OFX-NAL-CAZ-CRO-CFM-CTX-CEP-AMP             | fyuA-bmaE-papG III-papAH-fimH-hlyA-papC-papG II-traT-iroN-usp-cnf1   |
| 43 | 59 | Female | Razi     | MDR | Positive | AZT-GEN-SXT-IMI-CIP-OFX-NAL-CAZ-CRO-FEP-CFM-CTX-CEP-AUG-AMP     | fyuA-bmaE-papG III-fimH-hlyA-papC-papG II-traT-iroN-usp-cnf1         |

|    |    |        |        |         |          |                                                                 |                                                                       |
|----|----|--------|--------|---------|----------|-----------------------------------------------------------------|-----------------------------------------------------------------------|
| 44 | 73 | Male   | Razi   | MDR     | Positive | AZT-GEN-SXT-TET-CIP-OFX-NAL-CAZ-CRO-CFM-CTX-CEP-AMP             | fyuA-bmaE-papG III-papAH-fimH-kpsMT II-papG II-traT-iroN-usp          |
| 45 | 60 | Female | Razi   | MDR     | Positive | AZT-GEN-SXT-TET-CIP-OFX-NAL-CAZ-CRO-FEP-CFM-CTX-CEP-AUG-AMP     | fyuA-bmaE-papG III-fimH-hlyA-papC-papG II-traT-iroN-usp-cnf1          |
| 46 | 51 | Female | Golsar | MDR     | Negative | AZT-SXT-TET-CAZ-CRO-CFM-CTX-FOX-CEP-AUG-AMP                     | fyuA-papAH-fimH-hlyA-papG II-traT-iroN                                |
| 47 | 81 | Female | Razi   | MDR     | Positive | AZT-GEN-TET-IMI-CIP-OFX-NAL-CAZ-CRO-FEP-CFM-CTX-FOX-CEP-AUG-AMP | fyuA-papG III-fimH-hlyA-papC-papG II-traT-iroN-usp-cnf1               |
| 48 | 41 | Male   | Razi   | MDR     | Positive | AZT-GEN-SXT-TET-CIP-OFX-NAL-CAZ-CRO-CFM-CTX-CEP-AUG-AMP         | fyuA-fimH-rfc-papG II-traT-usp-cnf1                                   |
| 49 | 78 | Male   | Razi   | MDR     | Negative | GEN-SXT-TET-CIP-OFX-NAL-CFM-CEP                                 | fyuA-papG III-fimH-hlyA-papC-rfc-papG II-traT-usp-cnf1                |
| 50 | 52 | Male   | Razi   | MDR     | Positive | AZT-GEN-SXT-TET-CIP-NAL-CAZ-CRO-CFM-CTX-FOX-CEP-AMP             | fyuA-papG III-papAH-fimH-kpsMT II-papG II-traT-iroN-usp-afa/draBC     |
| 51 | 72 | Female | Golsar | MDR     | Positive | AZT-GEN-SXT-CIP-OFX-NAL-CAZ-CRO-CFM-CTX-CEP-AMP                 | fyuA-papAH-hlyA-kpsMT II-papC-papG II-traT-iroN-usp-cnf1              |
| 52 | 77 | Female | Golsar | MDR     | Positive | AZT-SXT-TET-NAL-CAZ-CRO-CTX-CEP-NIT-AUG-AMP                     | papG III-papAH-kpsMT II-papC-papG II-traT-usp-afa/draBC               |
| 53 | 74 | Female | Golsar | MDR     | Negative | GEN-CIP-OFX-NAL-CAZ-CFM-CTX-CEP-AMP                             | papG III-ibeA-fimH-hlyA-kpsMT II-papG II-traT-iroN-afa/draBC          |
| 54 | 85 | Male   | Razi   | MDR     | Positive | AZT-GEN-SXT-TET-CIP-OFX-NAL-CAZ-CRO-FEP-CFM-CTX-FOX-CEP-AMP     | ibeA-fimH-kpsMT II-papG II-traT-iroN-usp-afa/draBC                    |
| 55 | 62 | Female | Golsar | MDR     | Positive | AZT-SXT-TET-NAL-CRO-CFM-CTX-CEP-AMP                             | papG III-ibeA-fimH-hlyA-kpsMT II-papG II-traT-iroN-usp-afa/draBC-cnf1 |
| 56 | 24 | Female | Razi   | Non-MDR | Negative | None                                                            | papG III-fimH-kpsMT II-papC-papG II-traT-iroN-usp                     |
| 57 | 30 | Female | Golsar | MDR     | Negative | IMI-CIP-NAL-CTX-CEP                                             | papG III-ibeA-fimH-kpsMT II-papC-papG II-traT-iroN-usp                |
| 58 | 59 | Female | Razi   | Non-MDR | Negative | None                                                            | iutA-ibeA-fimH-hlyA-kpsMT II-papG II-traT-iroN-usp-cnf1               |

|    |    |        |             |         |          |                                                                 |                                                                    |
|----|----|--------|-------------|---------|----------|-----------------------------------------------------------------|--------------------------------------------------------------------|
| 59 | 2  | Male   | Al-Zahra    | MDR     | Positive | AZT-GEN-SXT-TET-CIP-OFX-NAL-CAZ-CRO-FEP-CFM-CTX-FOX-CEP-AUG-AMP | iutA-papG III-ibeA-fimH-hlyA-kpsMT II-traT-iroN-usp-afa/draBC-cnf1 |
| 60 | 63 | Male   | Poursina    | MDR     | Positive | AZT-GEN-SXT-TET-CIP-NAL-CAZ-CRO-FEP-CFM-CTX-FOX-CEP-AUG-AMP     | fyuA-iutA-ibeA-fimH-hlyA-kpsMT II-traT-iroN-usp-afa/draBC-cnf1     |
| 61 | 81 | Female | Rasol Akram | MDR     | Positive | AZT-TET-CAZ-CRO-FEP-CFM-CTX-CEP-AMP                             | papG III-fimH-papEF-kpsMT II-traT-iroN-usp-afa/draBC               |
| 62 | 22 | Female | Al-Zahra    | MDR     | Positive | AZT-SXT-TET-CIP-NAL-CAZ-CRO-CFM-CTX-CEP-AUG-AMP                 | papG III-fimH-papEF-kpsMT II-traT-iroN-usp-afa/draBC               |
| 63 | 65 | Female | Razi        | MDR     | Positive | AZT-GEN-SXT-TET-CIP-OFX-NAL-CAZ-FEP-CFM-CTX-FOX-CEP-AUG-AMP     | papG III-fimH-kpsMT II-traT-iroN-usp-afa/draBC                     |
| 64 | 50 | Female | Razi        | MDR     | Positive | AZT-SXT-TET-CIP-OFX-NAL-CAZ-CRO-CFM-CTX-CEP-AUG-AMP             | papG III-fimH-kpsMT II-traT-iroN-usp-afa/draBC                     |
| 65 | 11 | Female | Al-Zahra    | MDR     | Negative | AZT-SXT-CAZ-CRO-FEP-CFM-CTX-CEP-AUG-AMP                         | papG III-fimH-kpsMT II-traT-iroN-usp-afa/draBC                     |
| 66 | 67 | Female | Razi        | MDR     | Positive | AZT-GEN-SXT-TET-CIP-OFX-NAL-CAZ-CRO-FEP-CFM-CTX-FOX-CEP-AUG-AMP | fyuA-bmaE-fimH-kpsMT II-traT-usp-afa/draBC                         |
| 67 | ≤1 | Male   | Al-Zahra    | MDR     | Negative | SXT-CIP-NAL-CAZ-CRO-CTX-CEP-AUG-AMP                             | fyuA-fimH-kpsMT II-usp                                             |
| 68 | 35 | Male   | Golsar      | MDR     | Negative | AZT-SXT-TET-NAL-CAZ-CRO-CFM-CTX-CEP-AUG-AMP                     | fyuA-sfa/focDE-iutA-papG III-fimH-kpsMT II-rfc-traT-iroN-usp       |
| 69 | 54 | Female | Golsar      | Non-MDR | Negative | CEP                                                             | fyuA-fimH-traT-iroN-afa/draBC                                      |
| 70 | 67 | Male   | Razi        | MDR     | Positive | AZT-SXT-TET-CIP-OFX-NAL-CAZ-CRO-FEP-CFM-CTX-FOX-CEP-AUG-AMP     | fyuA-iutA-fimH-kpsMT II-traT-focG-afa/draBC                        |
| 71 | 35 | Female | Al-Zahra    | MDR     | Negative | AZT-SXT-TET-NAL-CAZ-CRO-FEP-CFM-CTX-CEP-AMP                     | fyuA-iutA-fimH-kpsMT II-traT-usp-afa/draBC                         |
| 72 | 2  | Female | Al-Zahra    | MDR     | Negative | SXT-NAL-CRO-CTX-CEP-AMP                                         | fyuA-iutA-papG III-fimH-papEF-kpsMT II-traT-iroN-usp-afa/draBC     |
| 73 | ≤1 | Male   | Al-Zahra    | MDR     | Positive | AZT-GEN-SXT-TET-IMI-CIP-NAL-CAZ-CRO-FEP-CFM-CTX-CEP-AUG-AMP     | fyuA-iutA-papAH-fimH-papEF-hlyA-papC-traT-iroN-usp-afa/draBC-sfaS  |

|    |    |        |             |         |          |                                                                         |                                                                                       |
|----|----|--------|-------------|---------|----------|-------------------------------------------------------------------------|---------------------------------------------------------------------------------------|
| 74 | 78 | Male   | Razi        | MDR     | Positive | AZT-GEN-SXT-TET-IMI-CIP-OFX-NAL-CAZ-CRO-FEP-CFM-CTX-FOX-CEP-NIT-AUG-AMP | fyuA-iutA-papAH-fimH-hlyA-papC-traT-iroN-usp-afa/draBC-sfaS                           |
| 75 | 43 | Female | Razi        | MDR     | Negative | SXT-TET-CIP-NAL-CTX-AMP                                                 | fyuA-papAH-fimH-papC-papG II-traT-iroN                                                |
| 76 | 48 | Female | Rasol Akram | MDR     | Positive | AZT-GEN-SXT-TET-CIP-OFX-NAL-CAZ-CRO-FEP-CFM-CTX-CEP-AUG-AMP             | fyuA-iutA-ibeA-papAH-fimH-hlyA-papC-papG II-traT-iroN-usp-afa/draBC-sfaS              |
| 77 | 60 | Female | Razi        | MDR     | Negative | GEN-SXT-TET-CIP-OFX-NAL-CFM-CEP                                         | fyuA-papAH-fimH-hlyA-papC-papG II-traT-iroN-usp-afa/draBC-sfaS                        |
| 78 | ≤1 | Female | Al-Zahra    | Non-MDR | Negative | None                                                                    | fyuA-sfa/focDE-iutA-papG III-fimH-kpsMT II-papG II-traT-iroN-usp-afa/draBC            |
| 79 | 35 | Female | Al-Zahra    | MDR     | Positive | AZT-SXT-TET-CIP-OFX-NAL-CAZ-CRO-CFM-CTX-FOX-CEP-AUG-AMP                 | fyuA-fimH-kpsMT II-papG II-traT-iroN-usp-afa/draBC                                    |
| 80 | ≤1 | Female | Rasol Akram | Non-MDR | Negative | TET-CFM                                                                 | fyuA-fimH-papG II-traT-iroN-afa/draBC                                                 |
| 81 | 62 | Male   | Poursina    | MDR     | Positive | AZT-SXT-TET-CIP-OFX-NAL-CAZ-CRO-FEP-CFM-CTX-CEP-AUG-AMP                 | fyuA-papG III-fimH-kpsMT II-papG II-traT-iroN-usp-afa/draBC                           |
| 82 | 29 | Female | Razi        | MDR     | Positive | AZT-GEN-SXT-TET-CIP-OFX-NAL-CAZ-CRO-FEP-CFM-CTX-FOX-CEP-AUG-AMP         | fyuA-papG III-fimH-kpsMT II-papG II-traT-iroN-afa/draBC                               |
| 83 | 45 | Female | Golsar      | Non-MDR | Negative | CEP-AMP                                                                 | fyuA-papG III-fimH-kpsMT II-rfc-papG II-traT-iroN-usp-afa/draBC-sfaS                  |
| 84 | 3  | Female | Al-Zahra    | Non-MDR | Negative | NAL                                                                     | fyuA-bmaE-papG III-fimH-papG II-traT-afa/draBC                                        |
| 85 | 84 | Female | Razi        | MDR     | Positive | AZT-GEN-SXT-TET-CIP-OFX-NAL-CAZ-CRO-FEP-CFM-CTX-FOX-CEP-AUG-AMP         | fyuA-papG III-fimH-kpsMT II-papG II-traT-afa/draBC                                    |
| 86 | 4  | Female | Rasol Akram | MDR     | Negative | AZT-SXT-TET-CAZ-CRO-CFM-CTX-FOX-CEP-AUG-AMP                             | fyuA-sfa/focDE-papG III-fimH-kpsMT II-papC-papG II-traT-afa/draBC                     |
| 87 | 88 | Male   | Poursina    | MDR     | Positive | AZT-GEN-CIP-OFX-NAL-CAZ-CRO-FEP-CFM-CTX-CEP-AUG-AMP                     | fyuA-bmaE-sfa/focDE-papG III-papAH-fimH-kpsMT II-papC-papG II-traT-iroN-usp-afa/draBC |

|     |    |        |             |     |          |                                                                     |                                                                                   |
|-----|----|--------|-------------|-----|----------|---------------------------------------------------------------------|-----------------------------------------------------------------------------------|
| 88  | 47 | Female | Razi        | MDR | Positive | AZT-GEN-SXT-TET-CIP-OFX-NAL-CAZ-CRO-FEP-CFM-CTX-CEP-AUG-AMP         | fyuA-bmaE-papG III-papAH-fimH-hlyA-kpsMT II-papC-papG II-traT-iroN-afa/draBC-cnf1 |
| 89  | 48 | Female | Golsar      | MDR | Positive | AZT-GEN-CIP-OFX-NAL-CAZ-CRO-FEP-CFM-CTX-CEP-AUG-AMP                 | fyuA-papG III-fimH-hlyA-kpsMT II-papC-papG II-iroN-afa/draBC-cnf1                 |
| 90  | 66 | Female | Razi        | MDR | Positive | AZT-GEN-SXT-TET-CIP-NAL-CAZ-CRO-FEP-CFM-CTX-FOX-CEP-AUG-AMP         | fyuA-bmaE-papG III-fimH-hlyA-kpsMT II-papC-papG II-iroN-afa/draBC-cnf1            |
| 91  | 77 | Female | Razi        | MDR | Negative | TET-CIP-OFX-NAL-CAZ-AMP                                             | fyuA-papG III-fimH-hlyA-kpsMT II-papC-papG II-iroN-afa/draBC-cnf1                 |
| 92  | 34 | Female | Razi        | MDR | Negative | SXT-CEP-AUG-AMP                                                     | fyuA-papG III-fimH-kpsMT II-papG II-iroN-cnf1                                     |
| 93  | 81 | Female | Rasol Akram | MDR | Positive | AZT-TET-CIP-OFX-NAL-CAZ-CRO-CFM-CTX-FOX-CEP-AUG-AMP                 | fyuA-sfa/focDE-iutA-papG III-fimH-hlyA-kpsMT II-papG II-iroN-cnf1                 |
| 94  | 74 | Female | Poursina    | MDR | Positive | AZT-SXT-CIP-OFX-NAL-CAZ-CRO-FEP-CFM-CTX-CEP-AUG-AMP                 | fyuA-sfa/focDE-iutA-papG III-fimH-hlyA-kpsMT II-papC-iroN-afa/draBC-cnf1          |
| 95  | 74 | Female | Rasol Akram | MDR | Positive | AZT-GEN-SXT-TET-CIP-OFX-NAL-CAZ-CRO-FEP-CFM-CTX-FOX-CEP-NIT-AUG-AMP | fyuA-bmaE-papG III-fimH-hlyA-kpsMT II-papC-papG II-traT-iroN-afa/draBC-cnf1       |
| 96  | 23 | Female | Razi        | MDR | Negative | SXT-CEP-AUG-AMP                                                     | fyuA-iutA-papG III-fimH-hlyA-kpsMT II-papC-papG II-traT-iroN-usp-sfaS-cnf1        |
| 97  | 72 | Female | Rasol Akram | MDR | Positive | AZT-GEN-TET-IMI-CIP-OFX-NAL-CAZ-CRO-FEP-CFM-CTX-FOX-CEP-AUG-AMP     | fyuA-iutA-fimH-papC-papG II-iroN-sfaS-cnf1                                        |
| 98  | 82 | Female | Rasol Akram | MDR | Negative | AZT-NAL-CAZ-CRO-CFM-CTX-CEP-AUG-AMP                                 | fyuA-ibeA-fimH-papG II-traT-iroN-cnf1                                             |
| 99  | 49 | Female | Razi        | MDR | Negative | SXT-NAL-CTX                                                         | fyuA-fimH-kpsMT II-papG II-traT-iroN-cnf1                                         |
| 100 | ≤1 | Female | Al-Zahra    | MDR | Negative | SXT-TET-CAZ-CRO-AUG-AMP                                             | fyuA-fimH-hlyA-kpsMT II-papC-papG II-traT-iroN-cnf1                               |
| 101 | 80 | Male   | Golsar      | MDR | Negative | TET-CEP-AMP                                                         | papG III-ibeA-fimH-hlyA-kpsMT II-papC-papG II-traT-iroN-usp                       |

|     |    |        |             |         |          |                                                                 |                                                                                                            |
|-----|----|--------|-------------|---------|----------|-----------------------------------------------------------------|------------------------------------------------------------------------------------------------------------|
| 102 | ≤1 | Female | Al-Zahra    | Non-MDR | Negative | NAL                                                             | iutA-fimH-hlyA-kpsMT II-papC-papG II-afa/draBC-sfaS-cnf1                                                   |
| 103 | 79 | Male   | Poursina    | MDR     | Positive | AZT-GEN-SXT-TET-CIP-OFX-NAL-CAZ-CRO-FEP-CFM-CTX-FOX-CEP-AUG-AMP | fyuA-iutA-papG III-fimH-papEF-hlyA-kpsMT II-papC-papG II-usp-afa/draBC-sfaS-cnf1                           |
| 104 | 80 | Male   | Rasol Akram | MDR     | Negative | SXT-IMI-CIP-NAL-CRO-CEP                                         | fyuA-papG III-fimH-kpsMT II-papC-papG II-focG-usp-afa/draBC-cnf1                                           |
| 105 | 43 | Female | Golsar      | Non-MDR | Negative | None                                                            | fyuA-bmaE-iutA-papG III-fimH-hlyA-kpsMT II-papC-papG II-iroN-afa/draBC                                     |
| 106 | 69 | Male   | Razi        | MDR     | Negative | CIP-OFX-NAL-CAZ-CFM-CTX-CEP-AMP                                 | fyuA-sfa/focDE-iutA-papG III-fimH-hlyA-kpsMT II-papG II-iroN-afa/draBC                                     |
| 107 | 59 | Female | Golsar      | Non-MDR | Negative | CIP-NAL                                                         | fyuA-papG III-fimH-hlyA-kpsMT II-papC-papG II-traT-iroN-afa/draBC                                          |
| 108 | ≤1 | Male   | Al-Zahra    | MDR     | Negative | SXT-TET-CTX-CEP-AUG                                             | fyuA-iutA-papG III-fimH-hlyA-kpsMT II-papC-papG II-traT-usp-cnf1                                           |
| 109 | 25 | Female | Golsar      | MDR     | Positive | AZT-SXT-TET-NAL-CAZ-CRO-CFM-CTX-CEP-AMP                         | fyuA-iutA-papG III-ibeA-papEF-hlyA-papC-papG II-usp-cnf1                                                   |
| 110 | 30 | Female | Golsar      | MDR     | Positive | AZT-SXT-TET-TET-CIP-OFX-NAL-CAZ-CRO-FEP-CFM-CTX-CEP-AUG-AMP     | fyuA-papAH-fimH-papEF-hlyA-papC-traT-iroN-afa/draBC                                                        |
| 111 | 39 | Female | Golsar      | MDR     | Negative | SXT-TET-NAL-CRO-CEP-AMP                                         | fyuA-papG III-papAH-fimH-papEF-kpsMT II-papC-iroN-afa/draBC-cnf1                                           |
| 112 | 77 | Male   | Golsar      | MDR     | Positive | AZT-GEN-TET-CIP-OFX-NAL-CAZ-CRO-FEP-CFM-CTX-FOX-CEP-AUG-AMP     | fyuA-sfa/focDE-papG III-papAH-fimH-papEF-kpsMT II-papC-papG II-traT-usp-afa/draBC-cnf1                     |
| 113 | 86 | Male   | Golsar      | MDR     | Negative | SXT-TET-NAL-AMP                                                 | fyuA-sfa/focDE-iutA-papG III-papAH-fimH-papEF-hlyA-kpsMT II-papC-papG II-traT-iroN-usp-afa/draBC-sfaS-cnf1 |
| 114 | ≤1 | Male   | Al-Zahra    | MDR     | Positive | AZT-GEN-SXT-TET-CIP-CAZ-CRO-FEP-CFM-CTX-CEP-AUG-AMP             | fyuA-papG III-papAH-fimH-kpsMT II-papC-papG II-traT-iroN-cnf1                                              |
| 115 | 62 | Female | Golsar      | Non-MDR | Negative |                                                                 | fyuA-iutA-papG III-papAH-kpsMT II-papC-papG II-traT-iroN-cnf1                                              |
| 116 | 56 | Female | Golsar      | MDR     | Negative | AZT-SXT-SXT-TET-CIP-NAL-CRO-FEP-CFM-CTX-CEP-AUG-AMP             | fyuA-papG III-papAH-fimH-kpsMT II-papC-papG II-traT-iroN-usp-afa/draBC                                     |



|     |    |        |             |         |          |                                                                 |                                                                         |
|-----|----|--------|-------------|---------|----------|-----------------------------------------------------------------|-------------------------------------------------------------------------|
| 117 | 31 | Female | Golsar      | Non-MDR | Negative | None                                                            | fimH-kpsMT II-papG II-traT-usp-afa/draBC-cnf1                           |
| 118 | 72 | Female | Golsar      | Non-MDR | Negative | CEP                                                             | fyuA-papG III-fimH-kpsMT II-papG II-traT-iroN-afa/draBC                 |
| 119 | 73 | Female | Golsar      | MDR     | Positive | AZT-SXT-TET-CIP-OFX-NAL-CAZ-CRO-FEP-CFM-CTX-CEP-AUG-AMP         | fyuA-iutA-ibeA-fimH-kpsMT II-papC-papG II-traT-afa/draBC                |
| 120 | 41 | Male   | Golsar      | MDR     | Positive | AZT-SXT-TET-CIP-OFX-NAL-CAZ-CRO-FEP-CFM-CTX-CEP-AUG-AMP         | fyuA-sfa/focDE-papG III-papAH-fimH-papC-papG II-traT-iroN-usp-afa/draBC |
| 121 | 30 | Female | Golsar      | MDR     | Negative | SXT-TET-CIP-OFX-NAL-CEP-AMP                                     | fyuA-bmaE-sfa/focDE-papG III-fimH-kpsMT II-papC-papG II-traT-iroN       |
| 122 | ≤1 | Female | Rasol Akram | MDR     | Negative | TET-NAL-AMP                                                     | fyuA-fimH-kpsMT II-papC-papG II-traT-iroN                               |
| 123 | ≤1 | Male   | Al-Zahra    | MDR     | Negative | GEN-SXT-TET-CTX-AMP                                             | fimH-papG II-traT                                                       |
| 124 | 36 | Female | Golsar      | Non-MDR | Negative | None                                                            | fyuA-iutA-papAH-fimH-kpsMT II-papC-papG II-traT-iroN-usp                |
| 125 | 78 | Male   | Golsar      | MDR     | Positive | AZT-SXT-TET-CIP-OFX-NAL-CAZ-CRO-CFM-CTX-CEP-AMP                 | fyuA-iutA-fimH-kpsMT II-papC-papG II-traT-iroN-usp-afa/draBC-cnf1       |
| 126 | 60 | Female | Golsar      | MDR     | Positive | AZT-SXT-OFX-NAL-CAZ-CRO-FEP-CFM-CTX-CEP-AMP                     | fyuA-iutA-papAH-fimH-kpsMT II-papC-papG II-traT-iroN-cnf1               |
| 127 | 45 | Female | Golsar      | MDR     | Positive | AZT-GEN-SXT-TET-CIP-OFX-NAL-CAZ-CRO-FEP-CFM-CTX-FOX-CEP-AUG-AMP | fyuA-iutA-papAH-kpsMT II-papC-papG II-traT                              |
| 128 | 74 | Male   | Golsar      | MDR     | Positive | AZT-SXT-TET-CIP-OFX-NAL-CAZ-CRO-FEP-CFM-CTX-FOX-CEP-AUG-AMP     | fyuA-papAH-kpsMT II-papC-papG II-traT                                   |
| 129 | 57 | Female | Golsar      | MDR     | Positive | AZT-SXT-CIP-OFX-NAL-CAZ-CRO-FEP-CFM-CTX-CEP-AMP                 | fyuA-iutA-papAH-fimH-kpsMT II-papC-papG II-traT                         |

Abbreviations: ESBL: Extended-spectrum beta-lactamases; MDR: Multiple-drug resistant; AZT: Aztreonam; GEN: Gentamicin; SXT: Cotrimoxazole; TET: Tetracycline; IMI: Imipenem; CIP: Ciprofloxacin; OFX: Ofloxacin; NAL: Nalidixic acid; CAZ: Ceftazidime; Ceftriaxone: CRO; FEP: Cefepime; CFM: Cefixime; CTX: Cefotaxime ; FOX: Cefoxitin; CEP: Cephalothin; NIT: Nitrofurantoin; AUG: Amoxicillin/clavulanic acid; AMP: Ampicillin
